# Supplementary material for: Neutral noble gas compounds exhibiting a Xe–Xe bond: structure, stability and bonding situation
Source: Royal Society of Chemistry journal article supplement (doi:10.1039/c2cp41244f), 2012-01-01
Supplement: c2cp41244f.pdf [file c2cp41244f.pdf]

**Supporting Information** belonging to the manuscript:

## **Neutral Noble Gas Compounds Exhibiting a Xe–Xe Bond: Structure, Stability and Bonding Situation**

Israel Fernández\* and Gernot Frenking\*

Cartesian coordinates (in Å) and total energies (in a.u., zero point energy included) of all stationary points discussed in the text. All calculations have been performed at the M05-2X/def2-TZVPP level of theory. See text for computational details.

### **HXeXeX series (X = F to I)**

#### **HXeXeF, E = -758.867104**

|    |              |              |              |
|----|--------------|--------------|--------------|
| Xe | 1.818088000  | 0.000020000  | -0.000039000 |
| Xe | -1.287427000 | -0.000184000 | 0.000053000  |
| H  | 3.578632000  | 0.002385000  | 0.000667000  |
| F  | -3.581589000 | 0.000721000  | -0.000158000 |

#### **HXeXeCl, E = -1119.238277**

|    |              |              |              |
|----|--------------|--------------|--------------|
| Xe | 2.172566000  | 0.015726000  | 0.000005000  |
| Xe | -1.012642000 | -0.037729000 | -0.000006000 |
| H  | 3.934166000  | 0.094867000  | 0.000023000  |
| Cl | -3.915889000 | 0.064312000  | 0.000001000  |

#### **HXeXeBr, E = -3233.149486**

|    |              |              |              |
|----|--------------|--------------|--------------|
| Xe | -2.718396000 | -0.020193000 | -0.000001000 |
| Xe | 0.491464000  | 0.046498000  | 0.000001000  |
| H  | -4.483475000 | -0.107380000 | 0.000027000  |
| Br | 3.563937000  | -0.037516000 | 0.000000000  |

#### **HXeXeI, E = -956.721798**

|    |              |              |              |
|----|--------------|--------------|--------------|
| Xe | 3.217674000  | -0.013973000 | -0.000029000 |
| Xe | -0.037788000 | 0.030995000  | 0.000019000  |
| H  | 5.006463000  | -0.068799000 | 0.000843000  |
| I  | -3.334345000 | -0.016045000 | -0.000005000 |

#### **TS1-F, E = -758.850351**

|    |              |              |             |
|----|--------------|--------------|-------------|
| Xe | -0.404351000 | -1.683217000 | 0.000000000 |
|----|--------------|--------------|-------------|

|    |              |              |             |
|----|--------------|--------------|-------------|
| Xe | 0.000000000  | 1.425737000  | 0.000000000 |
| H  | -0.368539000 | -3.344221000 | 0.000000000 |
| F  | 2.467055000  | 1.916459000  | 0.000000000 |

**TS1-Cl, E = -1119.228154**

|    |              |              |             |
|----|--------------|--------------|-------------|
| Xe | -0.965469000 | -1.777392000 | 0.000000000 |
| Xe | 0.000000000  | 1.348323000  | 0.000000000 |
| H  | -1.153901000 | -3.461256000 | 0.000000000 |
| Cl | 3.134661000  | 1.566527000  | 0.000000000 |

**TS1-Br, E = -3233.141014**

|    |              |              |             |
|----|--------------|--------------|-------------|
| Xe | -2.023096000 | -1.398295000 | 0.000000000 |
| Xe | 0.000000000  | 1.220601000  | 0.000000000 |
| H  | -2.801133000 | -2.913081000 | 0.000000000 |
| Br | 3.201380000  | 0.357388000  | 0.000000000 |

**TS1-I, E = -381.167688**

|    |              |              |             |
|----|--------------|--------------|-------------|
| Xe | -2.834243000 | -0.566977000 | 0.000000000 |
| Xe | 0.000000000  | 1.266654000  | 0.000000000 |
| H  | -4.066018000 | -1.783298000 | 0.000000000 |
| I  | 2.964437000  | -0.679231000 | 0.000000000 |

**HXeF, E = -429.642483**

|    |              |              |             |
|----|--------------|--------------|-------------|
| Xe | 0.000096000  | -0.269190000 | 0.000000000 |
| H  | -0.006076000 | -1.937360000 | 0.000000000 |
| F  | 0.000096000  | 1.830401000  | 0.000000000 |

**HXeCl, E = -789.994825**

|    |              |              |             |
|----|--------------|--------------|-------------|
| Xe | 0.000099000  | -0.593482000 | 0.000000000 |
| H  | -0.007030000 | -2.285421000 | 0.000000000 |
| Cl | 0.000099000  | 2.019616000  | 0.000000000 |

**HXeBr, E = -2903.900839**

|    |              |              |             |
|----|--------------|--------------|-------------|
| Xe | 0.000099000  | -1.062373000 | 0.000000000 |
| H  | -0.008786000 | -2.761700000 | 0.000000000 |
| Br | 0.000099000  | 1.717996000  | 0.000000000 |

**HXeI, E = -627.467686**

|    |              |              |             |
|----|--------------|--------------|-------------|
| Xe | 0.000042000  | 1.449463000  | 0.000000000 |
| H  | -0.004520000 | 3.167379000  | 0.000000000 |
| I  | 0.000042000  | -1.536573000 | 0.000000000 |

**TS2-F, E = -555.207667**

|    |              |              |             |
|----|--------------|--------------|-------------|
| Xe | 0.024359000  | -0.330187000 | 0.000000000 |
| H  | -1.534641000 | -0.618187000 | 0.000000000 |
| F  | 0.024359000  | 2.049812000  | 0.000000000 |

**TS2-Cl, E = -789.940935**

|    |              |              |             |
|----|--------------|--------------|-------------|
| Xe | 0.021931000  | -0.695475000 | 0.000000000 |
| H  | -1.557088000 | -0.909148000 | 0.000000000 |
| Cl | 0.021931000  | 2.262634000  | 0.000000000 |

**TS2-Br, E = -2903.849300**

|    |              |              |             |
|----|--------------|--------------|-------------|
| Xe | 0.017603000  | -1.218663000 | 0.000000000 |
| H  | -1.566643000 | -1.413678000 | 0.000000000 |
| Br | 0.017603000  | 1.920613000  | 0.000000000 |

**TS2-I, E = -627.417214**

|    |              |              |             |
|----|--------------|--------------|-------------|
| Xe | 0.014757000  | -1.650445000 | 0.000000000 |
| H  | -1.578981000 | -1.807028000 | 0.000000000 |
| I  | 0.014757000  | 1.715680000  | 0.000000000 |

**HF, E = -100.468748**

|   |             |             |              |
|---|-------------|-------------|--------------|
| H | 0.000000000 | 0.000000000 | -0.827531000 |
| F | 0.000000000 | 0.000000000 | 0.091948000  |

**HCl, E = -460.800243**

|    |             |             |              |
|----|-------------|-------------|--------------|
| H  | 0.000000000 | 0.000000000 | -1.202608000 |
| Cl | 0.000000000 | 0.000000000 | 0.070742000  |

**HBr, E = -2574.692995**

|    |             |             |              |
|----|-------------|-------------|--------------|
| H  | 0.000000000 | 0.000000000 | -1.379654000 |
| Br | 0.000000000 | 0.000000000 | 0.039419000  |

**HI, E = -298.252604**

|   |             |             |              |
|---|-------------|-------------|--------------|
| H | 0.000000000 | 0.000000000 | -1.573712000 |
| I | 0.000000000 | 0.000000000 | 0.029693000  |

**RXeXeR' series (R = halogen atom)**

**FXeXeF, E = -858.155740**

|    |              |              |             |
|----|--------------|--------------|-------------|
| Xe | 0.000000000  | 1.443284000  | 0.000000000 |
| Xe | -0.000198000 | -1.443301000 | 0.000000000 |
| F  | 0.000630000  | 3.529462000  | 0.000000000 |
| F  | 0.000556000  | -3.529362000 | 0.000000000 |

**FXeXeCl, E = -1218.520748**

|    |              |              |             |
|----|--------------|--------------|-------------|
| Xe | -0.000468000 | -1.757835000 | 0.000000000 |
| F  | -0.000152000 | -3.858887000 | 0.000000000 |
| Xe | 0.000000000  | 1.204015000  | 0.000000000 |
| Cl | 0.001567000  | 3.802133000  | 0.000000000 |

**ClXeXeCl, E = -1578.890404**

|    |              |              |              |
|----|--------------|--------------|--------------|
| Xe | -1.530202000 | -0.000363000 | -0.000316000 |
| Xe | 1.530342000  | -0.000756000 | 0.000248000  |
| Cl | -4.161378000 | 0.001548000  | 0.000437000  |
| Cl | 4.160933000  | 0.002008000  | -0.000221000 |

**BrXeXeBr, E = -5806.712762**

|    |              |              |             |
|----|--------------|--------------|-------------|
| Xe | -0.000702000 | -1.565182000 | 0.000000000 |
| Xe | 0.000000000  | 1.565183000  | 0.000000000 |
| Br | 0.000175000  | -4.378329000 | 0.000000000 |
| Br | 0.000908000  | 4.378328000  | 0.000000000 |

**TS1-F,F, E = -858.096324**

|    |              |              |             |
|----|--------------|--------------|-------------|
| Xe | 0.000000000  | 1.328646000  | 0.000000000 |
| Xe | -0.405603000 | -1.507598000 | 0.000000000 |
| F  | 0.463654000  | 3.238948000  | 0.000000000 |
| F  | 1.969962000  | -2.165236000 | 0.000000000 |

**TS1-F,Cl, E = -1218.475240**

|    |              |              |             |
|----|--------------|--------------|-------------|
| Xe | 0.000000000  | 1.585214000  | 0.000000000 |
| Xe | -0.823884000 | -1.460859000 | 0.000000000 |
| F  | 0.621166000  | 3.504686000  | 0.000000000 |
| Cl | 2.288192000  | -2.250432000 | 0.000000000 |

**TS1-Cl,Cl, E = -1578.858998**

|    |              |              |             |
|----|--------------|--------------|-------------|
| Xe | 0.000000000  | 1.516684000  | 0.000000000 |
| Xe | -1.015523000 | -1.845730000 | 0.000000000 |
| Cl | 1.238783000  | 3.804671000  | 0.000000000 |
| Cl | 1.986995000  | -2.759465000 | 0.000000000 |

**TS1-Br,Br, E = -5806.690964**

|    |              |              |             |
|----|--------------|--------------|-------------|
| Xe | -1.881850000 | -1.065573000 | 0.000000000 |
| Xe | 0.000000000  | 2.103734000  | 0.000000000 |
| Br | 2.938154000  | 1.789645000  | 0.000000000 |

Br -0.034728000 -3.391379000 0.000000000

**FXeF, E = -528.921098**

Xe 0.000000000 0.001460000 0.000000000  
F 1.966724000 0.089735000 0.000000000  
F -1.966724000 -0.098494000 0.000000000

**FXeCl, E = -889.276709**

Xe 0.000000000 0.289072000 0.000000000  
F 0.031615000 2.291802000 0.000000000  
Cl -0.016737000 -2.131535000 0.000000000

**ClXeCl, E = -1249.635757**

Xe 0.000000000 0.000022000 0.000000000  
Cl 2.135395000 1.255138000 0.000000000  
Cl -2.135395000 -1.255207000 0.000000000

**TS2-F,F, E = -528.787911**

Xe 0.000000000 0.345412000 0.000000000  
F 1.605035000 -0.661827000 0.000000000  
F -1.605035000 -1.410643000 0.000000000

**TS2-F,Cl, E = -889.161788**

Xe 0.000000000 0.636547000 0.000000000  
F 1.924519000 0.278803000 0.000000000  
Cl -1.018863000 -2.169575000 0.000000000

**TS2-Cl,Cl, E = -1249.542240** (geometry optimized at the  
wB97XD/def2-TZVPP level)

Xe 0.000000000 0.718194000 0.000000000  
Cl 1.994569000 -0.676871000 0.000000000  
Cl -1.994569000 -1.604451000 0.000000000

**F<sub>2</sub>, E = -199.558711**

F 0.000000000 0.000000000 0.680028000  
F 0.000000000 0.000000000 -0.680028000

**FC1, E = -559.990579**

F 0.000000000 0.000000000 -1.056453000  
Cl 0.000000000 0.000000000 0.559299000

**Cl<sub>2</sub>, E = -920.370278**

Cl 0.000000000 0.000000000 0.996689000  
Cl 0.000000000 0.000000000 -0.996689000

**Br<sub>2</sub>, E = 5148.186559**

|    |             |             |              |
|----|-------------|-------------|--------------|
| Br | 0.000000000 | 0.000000000 | 1.144520000  |
| Br | 0.000000000 | 0.000000000 | -1.144520000 |
